# Supplementary material
Source: PubMed Central journal article supplement (PMC7357230)
Supplement: M20-3234_Supplement.pdf [file M20-3234_Supplement.pdf]

## Supplementary Material\*

Qaseem A, Etxeandia-Ikobaltzeta I, Yost J, et al. Use of N95, Surgical, and Cloth Masks to Prevent COVID-19 in Health Care and Community Settings: Living Practice Points From the American College of Physicians (Version 1). *Ann Intern Med*. 18 June 2020 [Epub ahead of print]. doi:10.7326/M20-3234

### *Supplement. Estimates*

\* This supplementary material was provided by the authors to give readers further details on their article. The material was reviewed but not copyedited.

## Supplement: Estimates

| Outcome Comparison                                                                                                                                                                                                           | Study Design <sup>^</sup> (N) | Evidence                                                                                                                                                                                                                                                                                                                                                                                                                                                                                                                                                                                                                                                                                                                                                                                                                                                                                                                                                                                                                                                                                                                                                                                                                                                                                                                                      | Certainty of Evidence* |
|------------------------------------------------------------------------------------------------------------------------------------------------------------------------------------------------------------------------------|-------------------------------|-----------------------------------------------------------------------------------------------------------------------------------------------------------------------------------------------------------------------------------------------------------------------------------------------------------------------------------------------------------------------------------------------------------------------------------------------------------------------------------------------------------------------------------------------------------------------------------------------------------------------------------------------------------------------------------------------------------------------------------------------------------------------------------------------------------------------------------------------------------------------------------------------------------------------------------------------------------------------------------------------------------------------------------------------------------------------------------------------------------------------------------------------------------------------------------------------------------------------------------------------------------------------------------------------------------------------------------------------|------------------------|
| <b>N95 Respirators vs. Surgical Masks vs. Cloth Masks in Community Settings</b>                                                                                                                                              |                               |                                                                                                                                                                                                                                                                                                                                                                                                                                                                                                                                                                                                                                                                                                                                                                                                                                                                                                                                                                                                                                                                                                                                                                                                                                                                                                                                               |                        |
| <div style="display: flex; align-items: center;"> <div style="margin-right: 10px;"><span style="color: green; font-weight: bold; font-size: 1.2em;">+</span></div> <b>Evidence for Potential Benefits<sup>¶</sup></b> </div> |                               |                                                                                                                                                                                                                                                                                                                                                                                                                                                                                                                                                                                                                                                                                                                                                                                                                                                                                                                                                                                                                                                                                                                                                                                                                                                                                                                                               |                        |
| <b>Risk of SARS-CoV-2 infection</b>                                                                                                                                                                                          |                               |                                                                                                                                                                                                                                                                                                                                                                                                                                                                                                                                                                                                                                                                                                                                                                                                                                                                                                                                                                                                                                                                                                                                                                                                                                                                                                                                               |                        |
| No studies identified                                                                                                                                                                                                        |                               |                                                                                                                                                                                                                                                                                                                                                                                                                                                                                                                                                                                                                                                                                                                                                                                                                                                                                                                                                                                                                                                                                                                                                                                                                                                                                                                                               |                        |
| <b>Risk of coronavirus infections (SARS-CoV-1, MERS-CoV)</b>                                                                                                                                                                 |                               |                                                                                                                                                                                                                                                                                                                                                                                                                                                                                                                                                                                                                                                                                                                                                                                                                                                                                                                                                                                                                                                                                                                                                                                                                                                                                                                                               |                        |
| <i>Masks (type not specified) vs. no masks</i>                                                                                                                                                                               | 3 OBS (2857)                  | Risk of SARS-CoV-1 (26-28) <ul style="list-style-type: none"> <li>• Wearing or not a mask when a SARS-CoV-1 infected person (index case) in a hospital setting was visited (26)               <ul style="list-style-type: none"> <li>○ Index case and household member using mask during the visit vs. index case not visited: Adjusted OR 1.77 (95% CI 0.79 to 3.97)</li> <li>○ Index case or household member wearing mask during the visit vs. index case not visited: Adjusted OR 1.62 (95% CI 0.70 to 3.76)</li> <li>○ Neither index case nor household member wearing mask during the visit vs. index case not visited: Adjusted OR 3.12 (95% CI 1.65, 5.91)</li> </ul> </li> <li>• Wearing a mask when a close contact is in contact with a SARS-CoV-1 infected person (index case) (27)               <ul style="list-style-type: none"> <li>○ Sometimes/most times wearing vs. never wearing a mask: OR with continuity correction 1.04 (95% CI 0.05 to 19.52)</li> </ul> </li> <li>• Wearing a mask among persons without known contact with SARS patients (28)               <ul style="list-style-type: none"> <li>○ Sometimes wearing a mask vs. never wearing a mask: Adjusted OR 0.4 (95% CI 0.2 to 0.9)</li> <li>○ Always wearing a mask vs. never wearing a mask: Adjusted OR 0.3 (95% CI 0.1 to 0.6)</li> </ul> </li> </ul> | Low                    |
| <b>Risk of non-coronavirus respiratory infections (influenza-like or other viral respiratory)</b>                                                                                                                            |                               |                                                                                                                                                                                                                                                                                                                                                                                                                                                                                                                                                                                                                                                                                                                                                                                                                                                                                                                                                                                                                                                                                                                                                                                                                                                                                                                                               |                        |
| <i>N95 respirators or equivalent vs. surgical masks</i>                                                                                                                                                                      | 1 RCT (290)                   | Risk of influenza-like illness (22) <ul style="list-style-type: none"> <li>• 2 adult household contacts wearing P2 masks vs. surgical masks at all times when in the same room as the index-case (child with fever and respiratory symptoms) (22)               <ul style="list-style-type: none"> <li>○ Unadjusted RR 0.75 (95% CI 0.40 to 1.41)</li> </ul> </li> </ul> Risk of laboratory confirmed viral respiratory illness (22) <ul style="list-style-type: none"> <li>• 2 adult household contacts wearing P2 masks vs. surgical masks at all times when in the same room as the index-case (child with fever and respiratory symptoms) (22)               <ul style="list-style-type: none"> <li>○ Unadjusted RR 1.36 (95% CI 0.49 to 3.77)</li> </ul> </li> </ul>                                                                                                                                                                                                                                                                                                                                                                                                                                                                                                                                                                     | Low                    |
| <i>N95 respirators or equivalent vs. no masks</i>                                                                                                                                                                            | 1 RCT (290)                   | Risk of influenza-like illness (22) <ul style="list-style-type: none"> <li>• 2 adult household contacts wearing P2 masks vs. no masks at all times when in the same room as the index-case (child with fever and respiratory symptoms) (22)               <ul style="list-style-type: none"> <li>○ Adjusted RR 0.95 (95% CI 0.49 to 1.84)</li> </ul> </li> </ul> Risk of laboratory-confirmed viral respiratory illness (22) <ul style="list-style-type: none"> <li>• 2 adult household contacts wearing P2 masks vs. no masks at all times when in the same room as the index-case (child with fever and respiratory symptoms) (22)               <ul style="list-style-type: none"> <li>○ Adjusted RR 2.90 (95% CI 0.79 to 10.6)</li> </ul> </li> </ul>                                                                                                                                                                                                                                                                                                                                                                                                                                                                                                                                                                                     | Low                    |
| <i>Surgical masks vs. no masks</i>                                                                                                                                                                                           | 12 RCTs (16761)               | <i>Risk of infections in household members/visitors with an influenza or influenza-like illness infected person (index case, e.g. child or adult)</i><br>Risk of clinical respiratory illness (21, 23) <ul style="list-style-type: none"> <li>• Surgical mask worn by caretaker in household (within 3 feet of index case for 7 days, changing mask between interactions) and index case (within 3 feet of household members if possible) when influenza-like illness occurred in any household member plus hand sanitizer vs. education only (21)               <ul style="list-style-type: none"> <li>○ Unadjusted rate per 1,000 person-weeks: mask + hand sanitizer 38.91 (1,972/50,676) vs. education only 35.38 (1,646/46,526); Adjusted model, <math>P = 0.190</math></li> </ul> </li> </ul>                                                                                                                                                                                                                                                                                                                                                                                                                                                                                                                                           | Moderate               |

- Surgical mask worn by index case at home whenever in same room as a household member or a visitor to the household vs. no mask (23)
  - RR 0.65 (95% CI 0.18 to 2.29), Adjusted for age RR 0.61 (95% CI 0.18 to 2.13)
  - Post-hoc analysis of mask wearers vs. non-mask wearers irrespective of randomization group: RR 0.23 (95% CI 0.06 to 0.88)

Risk of influenza-like illness (18-25)

- Surgical mask worn by index patient in household required to wear mask if another family member was in the same room vs. no mask (18)
    - Adjusted OR: 0.95 (95% CI 0.44 to 2.05)
  - Surgical mask worn by household contacts of index case (except when eating or sleeping) vs. lifestyle intervention (19)
    - Fever plus cough or sore throat: Adjusted OR 1.68 (95% CI 0.68 to 4.15)
    - Fever plus cough or sore throat when restricted to contacts of index cases receiving intervention within 36 hours of symptom onset: Adjusted OR 1.45 (95% CI 0.49 to 4.24)
    - $\geq 2$  influenza-like illness symptoms: Adjusted OR 1.25 (95% CI 0.79 to 1.98)
    - $\geq 2$  influenza-like illness symptoms when restricted to contacts of index cases receiving intervention within 36 hours of symptom onset: Adjusted OR 0.86 (95% CI 0.48 to 1.53)
  - Surgical mask worn by household contacts of index case (except when eating or sleeping) vs. lifestyle intervention (20)
    - Fever plus cough or sore throat: OR 2.00 (95% CI 0.57 to 7.02)
    - Fever or  $\geq 2$  influenza-like illness symptoms: OR 0.88 (95% CI 0.34 to 2.27)
    - $\geq 2$  influenza-like illness symptoms: OR 0.87 (95% CI 0.30 to 2.51)
  - Surgical mask to be worn by caretaker in household (within 3 feet of index case for 7 days, changing mask between interactions) and index case (within 3 feet of household members if possible) when influenza-like illness occurred in any household member plus hand sanitizer vs. education only (21)
    - Unadjusted rate per 1,000 person-weeks mask + hand sanitizer 1.56 (79/50,676) vs. education only 2.26 (105/46,526); Adjusted model,  $P = 0.160$
  - Surgical mask worn by index case at home whenever in same room as a household member or a visitor to the household vs. no mask (23)
    - RR 0.32 (95% CI 0.03 to 3.11)
    - Post-hoc analysis of mask wearers vs. non-mask wearers irrespective of randomization group: RR 0.18 (95% CI 0.02 to 1.71)
  - 2 adult household contacts wearing surgical mask vs. no mask at all times when in the same room as the index-case (child with fever and respiratory symptoms) (22)
    - Adjusted RR 1.29 (95% CI 0.69 to 2.31)
  - Surgical mask plus handwashing training vs. control (nutritional, physical activity and smoking cessation education) (24)
    - Adjusted OR 2.15 (95% CI 1.27 to 3.62)
    - If received intervention within 48 hours of index case symptom onset: OR 2.16 (95% CI 1.14 to 4.07)
  - Surgical mask plus hand sanitizer vs. surgical mask vs. no mask or hand sanitizer (25)
    - Surgical mask plus hand sanitizer vs. no mask or hand sanitizer: Adjusted OR 0.49 (95% CI 0.20 to 1.6) (including adjustment for cluster correlation)
    - Surgical mask plus hand sanitizer vs. no mask or hand sanitizer restricted to implementation of intervention within 36 hours after symptom onset: Adjusted OR 0.17 (95% CI 0.01 to 2.03)
    - Surgical mask vs. no mask or hand sanitizer: 0.50 (95% CI 0.20 to 1.60) (including adjustment for cluster correlation)
    - Surgical mask vs. no mask or hand sanitizer restricted to implementation of intervention within 36 hours after symptom onset: Adjust OR 0.63 (95% CI 0.08 to 4.92)
  - Risk of laboratory-confirmed viral illness (22, 23)
    - Surgical mask worn by index case at home whenever in same room as a household member or a visitor to the household vs. no mask (23)
-

- Number of household contacts with outcome per person-days RR 0.97 (95% CI 0.06 to 15.5)
- Post-hoc analysis of mask wearers vs. non-mask wearers irrespective of randomization group: HR 0.11 (95% CI 0.01 to 4.40)
- 2 adult household contacts wearing surgical vs. no masks at all times when in the same room as the index-case (child with fever and respiratory symptoms) (22)
  - Adjusted RR 2.13 (95% CI 0.55 to 8.26)

Risk of laboratory-confirmed influenza infection (19-21, 24, 25)

- Surgical mask worn by household contacts of index case (except when eating or sleeping) vs. lifestyle intervention (19)
  - Adjusted OR 0.77 (95% CI 0.38 to 1.55)
  - When restricted to contacts of index cases receiving intervention within 36 hours of symptoms Adjusted OR 0.33 (95% CI 0.13 to 0.87)
- Surgical mask worn by household contacts of index case (except when eating or sleeping) vs. lifestyle intervention (20)
  - OR 1.16 (95% CI 0.31 to 4.34)
- Surgical mask worn by caretaker in household (within 3 feet of index case for 7 days, changing mask between interactions) and index case (within 3 feet of household members if possible) when influenza-like illness occurred in any household member plus hand sanitizer vs. education only (21)
  - Unadjusted rate per 1,000 person-weeks: masks plus hand sanitizer 0.49 (29/50,676) vs. education only 0.52 (24/46,526); from adjusted model,  $P=0.89$
- Surgical mask plus handwashing training vs. control (nutritional, physical activity and smoking cessation education) (24) Adjusted OR 1.16 (95% CI 0.74 to 1.82)
  - If received intervention within 48 hours of index case symptom onset: 1.15 (95% CI 0.68 to 1.93)
  - Surgical masks plus hand sanitizer vs. surgical mask vs. no mask or hand sanitizer (25)
  - Surgical mask plus hand sanitizer vs. no mask or hand sanitizer: Adjusted OR 0.59 (95% CI 0.20 to 1.5) (including adjustment for cluster correlation)
  - Surgical mask plus hand sanitizer vs. no mask or hand sanitizer restricted to implementation of intervention within 36 hours after symptom onset: Adjusted OR 0.13 (95% CI 0.01 to 1.28)
  - Surgical mask vs. no mask or hand sanitizer: 0.30 (95% CI 0.10 to 0.94) for B vs. C (including adjustment for cluster correlation)
  - Surgical mask vs. no mask or hand sanitizer restricted to implementation of intervention within 36 hours after symptom onset: Adjusted OR 0.21 (95% CI 0.02 to 2.02)

*Risk of infections in university students without specific contact with cases* (14, 15)

Risk of influenza-like illness:

- Surgical mask plus hand sanitizer vs. surgical mask vs. no mask or hand sanitizer (14)
  - Surgical mask plus hand sanitizer vs. no mask or hand sanitizer Adjusted IRR 0.87 (95% CI 0.73 to 1.02)
  - Surgical mask vs. no mask or hand sanitizer 0.90 (95% CI 0.77 to 1.05)
- Surgical masks plus hand sanitizer vs. surgical mask vs. no mask or hand sanitizer (15)
  - Surgical mask plus hand sanitizer vs. no mask or hand sanitizer: Adjusted IRR 0.78 (95% CI 0.57 to 1.08)
  - Surgical mask vs. no mask or hand sanitizer: Adjusted IRR 1.10 (95% CI 0.88 to 1.38)

*Risk of laboratory-confirmed influenza*

- Surgical mask plus hand sanitizer vs. surgical mask vs. no mask or hand sanitizer (14)
    - Surgical mask plus hand sanitizer 0.5% vs. surgical mask 1.3% vs. no mask or hand sanitizer 0.5%
  - Surgical mask plus hand sanitizer vs. surgical mask vs. no mask or hand sanitizer (15)
    - Surgical mask plus hand sanitizer vs. no mask or hand sanitizer: Adjusted HR 0.57 (95% CI 0.26 to 1.24)
    - Surgical mask vs. no mask or hand sanitizer: Adjusted IRR 0.92 (95% CI 0.59 to 1.42)
-

*Risk of infections in Hajj pilgrims with or without an infected index case within the same tent (16, 17)*

Risk of clinical respiratory illness

- Surgical mask plus educational material vs. no mask or educational material (16)
  - OR 1.10 (95% CI 0.88 to 1.39)

Risk of laboratory-confirmed viral illness

- Surgical mask plus educational material vs. no mask or educational material (16)
  - OR 1.35 (95% CI 0.88 to 2.07)
- Surgical mask plus education vs. general information on hygiene (17)
  - 10.3% (4/39) vs. 5.7% (2/35)

Risk of influenza-like illness

- Surgical mask plus education vs. general information on hygiene (17)
  - 31% (11/36) vs. 53% (28/53)  $P = 0.040$

|  Evidence for Potential Harms <sup>¶</sup> |               |                                                                                                                                                                                                                                                                                                                                                                                                                                                                                                                             |          |
|-----------------------------------------------------------------------------------------------------------------------------|---------------|-----------------------------------------------------------------------------------------------------------------------------------------------------------------------------------------------------------------------------------------------------------------------------------------------------------------------------------------------------------------------------------------------------------------------------------------------------------------------------------------------------------------------------|----------|
| <i>N95 respirators equivalent vs. surgical mask</i>                                                                         | 1 RCT (290)   | <ul style="list-style-type: none"> <li>• No reported problem (22)                             <ul style="list-style-type: none"> <li>○ P2 masks 46% vs. surgical masks 49%</li> </ul> </li> <li>• Uncomfortable (22)                             <ul style="list-style-type: none"> <li>○ P2 masks 15% vs. surgical masks 17% (22)</li> </ul> </li> </ul>                                                                                                                                                                   | Low      |
| <i>Surgical masks vs. no masks</i>                                                                                          | 3 RCTs (8363) | <ul style="list-style-type: none"> <li>• Discomfort: (16, 18, 20)                             <ul style="list-style-type: none"> <li>○ Discomfort with mask use: 75% of the surgical mask group reported discomfort with mask use (18)</li> <li>○ Overall discomfort: 22% (16)</li> </ul> </li> <li>• Breathing difficulty: 26% (16)</li> <li>• Feeling hot: 3% (16)</li> <li>• Adverse Events:                             <ul style="list-style-type: none"> <li>○ No adverse events reported (20)</li> </ul> </li> </ul> | Moderate |

**N95 Respirators vs. Surgical Masks vs. Cloth Masks in Healthcare Settings**

|  Evidence for Potential Benefits <sup>¶</sup> |              |                                                                                                                                                                                                                                                                                                                                                                                                                                                                                                                                                                                                                                                                                                                                                                                                                                                                                                                 |              |
|----------------------------------------------------------------------------------------------------------------------------------|--------------|-----------------------------------------------------------------------------------------------------------------------------------------------------------------------------------------------------------------------------------------------------------------------------------------------------------------------------------------------------------------------------------------------------------------------------------------------------------------------------------------------------------------------------------------------------------------------------------------------------------------------------------------------------------------------------------------------------------------------------------------------------------------------------------------------------------------------------------------------------------------------------------------------------------------|--------------|
| <b>Risk of SARS-CoV-2 infection</b>                                                                                              |              |                                                                                                                                                                                                                                                                                                                                                                                                                                                                                                                                                                                                                                                                                                                                                                                                                                                                                                                 |              |
| <i>N95 respirators vs. no masks</i>                                                                                              | 1 OBS (493)  | Risk of infection with SARS-CoV-2 (50) <ul style="list-style-type: none"> <li>• Nurses and physicians in departments that wore N95 respirator plus disinfecting and cleaning hands frequently vs. those in departments not wearing medical masks plus disinfecting and cleaning hands (50)                             <ul style="list-style-type: none"> <li>○ Adjusted OR 0.002 (95% CI 0.0 to 0.21)<sup>¶¶</sup></li> </ul> </li> </ul> <small>¶¶ The direction of the comparison was reversed from no vs. yes as reported in study, for which the 95% CI was 97.73 to ∞</small>                                                                                                                                                                                                                                                                                                                             | Insufficient |
| <i>Consistent mask use (non-N95 respirator) vs. inconsistent mask use (non-95 respirator)</i>                                    | 1 OBS (37)   | Risk of infection with SARS-CoV-2 (39) <ul style="list-style-type: none"> <li>• Symptomatic health care workers after a potential exposure to hospitalized SARS-CoV-2 positive index patient (39)                             <ul style="list-style-type: none"> <li>○ Wearing non-N95 respirators always vs. wearing non-95 respirator sometimes or never during aerosol generating procedures: OR 0.77 (95% CI 0.03 to 20.02)</li> <li>○ Wearing non-N95 respirator always vs. sometimes or never during non-aerosol generating procedures: OR 1.29 (95% CI 0.05 to 30.38)</li> </ul> </li> </ul>                                                                                                                                                                                                                                                                                                             | Insufficient |
| <b>Risk of coronavirus infections (SARS-CoV-1, MERS-CoV)</b>                                                                     |              |                                                                                                                                                                                                                                                                                                                                                                                                                                                                                                                                                                                                                                                                                                                                                                                                                                                                                                                 |              |
| <i>N95 respirators or equivalent masks vs. surgical masks</i>                                                                    | 5 OBS (1208) | Risk of SARS-CoV-1 infection (36, 37, 41, 42, 47) <ul style="list-style-type: none"> <li>• Health care workers who entered room of patient with unrecognized SARS-1 (36)                             <ul style="list-style-type: none"> <li>○ N95, gown, and gloves vs. surgical mask, gown, and gloves: OR 0.40 (95% CI 0.03 to 6.18)</li> </ul> </li> <li>• Health care workers who performed tracheal intubations in SARS-CoV-1 patients (37)                             <ul style="list-style-type: none"> <li>○ N95 respirator or equivalent vs. surgical mask during intubation: OR 0.12 (95% CI 0.01 to 1.92)</li> </ul> </li> <li>• Health care workers who were probable cases or with self-reported exposure to SARS-CoV-1 patients (41)                             <ul style="list-style-type: none"> <li>○ N95 vs. disposable surgical mask: OR 0.49 (95% CI 0.10 to 2.35)</li> </ul> </li> </ul> | Low          |

- Nurses in a critical care unit that caring for SARS patients (42)
  - N95 vs. surgical mask: RR 0.50 (95% CI 0.06 to 4.23)
- Health care workers caring for intubated SARS-CoV-1 patients during treatment or transportation, or who entered the room of such patients from 24 hours prior to intubation until 4 hours after intubation (47)
  - N95 or equivalent vs. no mask while in the patient's room: OR 0.18 (95% CI 0.06 to 0.53)

|                                                          |                 |                                                                                                                                                                                                                                                                                                                                                                                                                                                                                                                                                                                                                                                                                                                                                                                                                                                                                                                                                                                                                                                                                                                                                                                                                                                                                                                                                                                                                             |              |
|----------------------------------------------------------|-----------------|-----------------------------------------------------------------------------------------------------------------------------------------------------------------------------------------------------------------------------------------------------------------------------------------------------------------------------------------------------------------------------------------------------------------------------------------------------------------------------------------------------------------------------------------------------------------------------------------------------------------------------------------------------------------------------------------------------------------------------------------------------------------------------------------------------------------------------------------------------------------------------------------------------------------------------------------------------------------------------------------------------------------------------------------------------------------------------------------------------------------------------------------------------------------------------------------------------------------------------------------------------------------------------------------------------------------------------------------------------------------------------------------------------------------------------|--------------|
| <i>N95 respirators or surgical masks vs. cloth masks</i> | 3 OBS<br>(1207) | <p>Risk of SARS-CoV-1 infection (41, 43, 52)</p> <ul style="list-style-type: none"> <li>• Health care workers who were probable cases or with self-reported exposure to SARS-CoV-1 patients (41)               <ul style="list-style-type: none"> <li>○ N95 vs. vs. 12- or 16- layer cotton mask: OR 1.05 (95% CI 0.24 to 4.66)</li> <li>○ Disposable surgical mask vs. 12- or 16-layer cotton mask: 2.13 (95% CI 1.00 to 4.54) *</li> </ul> </li> <li>• Health care workers who had contacted or treated SARS-CoV-1 patients (43)               <ul style="list-style-type: none"> <li>○ N95 and respirator vs. ≤12 layer: 0.00 (95% CI 0.00 to 0.33)</li> <li>○ Disposable surgical mask vs. ≤12 layer: OR 0.13 (95% CI 0.05 to 0.34)</li> </ul> </li> <li>• Staff members that accessed the isolation unit every day, and participated in direct first aid for severe SARS patients (52)               <ul style="list-style-type: none"> <li>○ Disposable surgical mask vs. ≥12-layer mask: OR 3.39 (95% CI 1.72 to 6.67)</li> </ul> </li> </ul>                                                                                                                                                                                                                                                                                                                                                                        | Insufficient |
| <i>N95 respirators or surgical masks vs. no masks</i>    | 1 OBS<br>(31)   | <ul style="list-style-type: none"> <li>• Health care workers who entered room of patient with unrecognized SARS-1 (36)               <ul style="list-style-type: none"> <li>○ N95respirators or surgical mask vs. no masks: OR 1.50 (95% CI 0.25 to 8.98)</li> </ul> </li> </ul>                                                                                                                                                                                                                                                                                                                                                                                                                                                                                                                                                                                                                                                                                                                                                                                                                                                                                                                                                                                                                                                                                                                                            | Insufficient |
| <i>N95 respirators vs. no masks</i>                      | 4 OBS<br>(1441) | <p>Risk of SARS-CoV-1 infection (41, 47-49)</p> <ul style="list-style-type: none"> <li>• Health care workers who were probable cases or with self-reported exposure to SARS-CoV-1 patients (41)               <ul style="list-style-type: none"> <li>○ N95 vs. no mask: Adjusted OR 0.52 (95% CI 0.12 to 2.24)</li> </ul> </li> <li>• Health care workers caring for intubated SARS-CoV-1 patients during treatment or transportation, or who entered the room of such patients from 24 hours prior to intubation until 4 hours after intubation (47)               <ul style="list-style-type: none"> <li>○ N95 or equivalent vs. no mask: OR 0.59 (95% CI 0.17 to 2.08)</li> <li>○ N95 or higher vs. no mask: OR 0.25 (95% CI 0.01 to 4.98)</li> </ul> </li> <li>• Health care workers with documented exposures to SARS-CoV-1 patients (48)               <ul style="list-style-type: none"> <li>○ N95 vs. no mask during patient care: OR 0.003 (95% CI 0.002 to 0.59)</li> </ul> </li> <li>• Health care workers who were probable cases or with self-reported exposure to SARS patients (49)               <ul style="list-style-type: none"> <li>○ N95 vs. no mask: Adjusted OR 0.1 (95% CI 0.02 to 0.9)</li> </ul> </li> </ul>                                                                                                                                                                                      | Low          |
| <i>Surgical masks vs. no masks</i>                       | 6 OBS<br>(1782) | <p>Risk of SARS-CoV-1 infection (41, 42, 44, 47, 48, 52)</p> <ul style="list-style-type: none"> <li>• Health care workers who were probable cases or with self-reported exposure to SARS-CoV-1 patients (41)               <ul style="list-style-type: none"> <li>○ Disposable surgical mask vs. no mask: OR 1.12 (95% CI 0.55, 2.27)</li> </ul> </li> <li>• Nurses in a critical care unit that caring for SARS patients (42)               <ul style="list-style-type: none"> <li>○ Surgical vs. no mask: RR 0.45 (95% CI 0.07, 2.71)</li> </ul> </li> <li>• Health care workers with SARS-CoV-1 seropositivity (44)               <ul style="list-style-type: none"> <li>○ Surgical mask use vs. no mask use in Period 1 (26 February to 4 March, 2003): Unadjusted OR 0.3 (95% CI 0.1 to 0.7)</li> <li>○ Surgical mask vs. no mask use in Period 2 (5 March to 10 March, 2003: Unadjusted OR 0.1 (95% CI 0.0 to 0.3)</li> </ul> </li> <li>• Health care workers caring for intubated SARS-CoV-1 patients during treatment or transportation, or who entered the room of such patients from 24 hours prior to intubation until 4 hours after intubation (47)               <ul style="list-style-type: none"> <li>○ Surgical mask vs. no mask while in patient's room: OR 3.27 (95% CI 95% CI 0.72 to 14.79)</li> </ul> </li> <li>• Health care workers with documented exposures to SARS-CoV-1 patients (48)</li> </ul> | Insufficient |

- Surgical mask vs. no mask during patient care: OR 0.06 (95% CI 0.004 to 1.06)
- Staff members that accessed the isolation unit every day, and participated in direct first aid for severe SARS patients (52)
  - Disposable mask vs. no mask: OR 0.22 (95% CI 0.02 to 1.29)

|                                                                           |                 |                                                                                                                                                                                                                                                                                                                                                                                                                                                                                                                                                                                                                                                                                                                                                                                                                                                                                                                                                                                                                                                                                                                                                                                                                                                                                                                                                                                                                                                                                                                                                                                                                                                                                                       |              |
|---------------------------------------------------------------------------|-----------------|-------------------------------------------------------------------------------------------------------------------------------------------------------------------------------------------------------------------------------------------------------------------------------------------------------------------------------------------------------------------------------------------------------------------------------------------------------------------------------------------------------------------------------------------------------------------------------------------------------------------------------------------------------------------------------------------------------------------------------------------------------------------------------------------------------------------------------------------------------------------------------------------------------------------------------------------------------------------------------------------------------------------------------------------------------------------------------------------------------------------------------------------------------------------------------------------------------------------------------------------------------------------------------------------------------------------------------------------------------------------------------------------------------------------------------------------------------------------------------------------------------------------------------------------------------------------------------------------------------------------------------------------------------------------------------------------------------|--------------|
| <i>Cloth masks vs. no masks</i>                                           | 3 OBS<br>(1177) | <p>Risk of SARS-CoV-1 infection (41, 46, 52)</p> <ul style="list-style-type: none"> <li>● Health care workers who were probable cases or with self-reported exposure to SARS-CoV-1 patients (41)               <ul style="list-style-type: none"> <li>○ 12-layer cotton surgical mask vs. no mask : adjusted OR 0.22 (95% C, 0.08 to 0.62)</li> <li>○ 16-layer cotton surgical mask vs. no mask: OR, 0.17 (95% CI 0.07 to 0.41)</li> </ul> </li> <li>● Health care workers in high-risk setting (46)               <ul style="list-style-type: none"> <li>○ Cotton mask vs. no mask: Unadjusted OR 0.48 (95% CI 0.25 to 0.95)</li> <li>○ Double 12-layer cotton mask vs. no mask: Unadjusted OR 0.13 (95% CI 0.05 to 0.30)</li> </ul> </li> <li>● Staff members that accessed the isolation unit every day, and participated in direct first aid for severe SARS patients (52)               <ul style="list-style-type: none"> <li>○ ≥12-layer mask vs. no mask: Adjusted OR 0.78 (95% CI 0.60 to 0.99)</li> </ul> </li> </ul>                                                                                                                                                                                                                                                                                                                                                                                                                                                                                                                                                                                                                                                                       | Insufficient |
| <i>Masks (type not specified) vs. no masks</i>                            | 5 OBS<br>(1167) | <p>Risk of SARS-CoV-1 infection (43, 45, 48, 51, 52)</p> <ul style="list-style-type: none"> <li>● Health care workers who had contacted or treated SARS-CoV-1 patients (43)               <ul style="list-style-type: none"> <li>○ Mask use vs. no mask use: Unadjusted OR 0.24 (95% CI 0.009 to 0.64) (Note: Mask use not included in multivariate model)</li> </ul> </li> <li>● Health care workers in contact with SARS patients (45)               <ul style="list-style-type: none"> <li>○ Mask use always vs. no: Adjusted OR 0.38 (95% CI 0.01 to 0.50)</li> </ul> </li> <li>● Health care workers with documented exposures to SARS-CoV-1 patients (48)               <ul style="list-style-type: none"> <li>○ Mask use vs. no mask: Adjusted OR 0.08 (95% CI 0.02 to 0.33)</li> </ul> </li> <li>● Health care workers exposed in SARS-CoV-1 prior to infection control implementation (51)               <ul style="list-style-type: none"> <li>○ Mask use vs. no mask: Unadjusted OR 0.25 (95% CI 0.09-0.69)</li> </ul> </li> <li>● Staff members that accessed the isolation unit every day, and participated in direct first aid for severe SARS patients (52)               <ul style="list-style-type: none"> <li>○ Mask use vs. no mask: Unadjusted OR 0.08 (95% CI 0.01 to 0.43)</li> </ul> </li> </ul>                                                                                                                                                                                                                                                                                                                                                                               | Low          |
| <i>Consistent mask use (type not specified) vs. inconsistent mask use</i> | 4 OBS<br>(626)  | <p>Risk of SARS-CoV-1 and MERS-CoV infection (35, 40, 42, 45)</p> <ul style="list-style-type: none"> <li>● Health care providers who had contact with MERS-CoV cases (35)               <ul style="list-style-type: none"> <li>○ Always vs. sometimes/never using N95 or medical mask during direct contact: RR 0.69 (95% CI 0.28 to 1.69)</li> <li>○ Always vs. sometimes/never using N95 during direct contact: RR 0.44 (95% CI 0.17 to 1.12)</li> <li>○ Always vs. sometimes/never using medical mask during direct contact: RR 2.06 (95% CI 0.86 to 4.95)</li> <li>○ Always vs. sometimes/never using N95 or medical mask during aerosol-generating procedure: RR 0.32 (95% CI 0.12 to 0.86)</li> <li>○ Always vs. sometimes/never using N95 during aerosol-generating procedure: Adjusted RR 0.44 (95% CI 0.15 to 1.24)</li> <li>○ Always vs. sometimes/never using medical mask during aerosolizing procedure: RR 0.59 (95% CI 0.20 to 1.71)</li> </ul> </li> <li>● Nurses in a critical care unit that caring for SARS (42)               <ul style="list-style-type: none"> <li>○ Consistent vs. inconsistent use of N95: RR 0.22 (95% CI 0.05 to 0.93)</li> <li>○ Consistent vs. inconsistent use of N95 or surgical mask: RR 0.23 (95% CI 0.07 to 0.78)</li> </ul> </li> <li>● Health care workers on wards with SARS inpatients (40)               <ul style="list-style-type: none"> <li>○ Consistent vs. inconsistent use of a N95 or surgical mask: RR 0.27 (95% CI 0.08 to 0.95)</li> <li>○ Consistent vs. inconsistent use of a N95 or surgical mask during direct contact with SARS-1 patient: OR 0.50 (95% CI 0 to 20) (Note: reversed from inconsistent vs.</li> </ul> </li> </ul> | Low          |

- consistent as reported in study, 95% CI 0.05 to ∞)
- Consistent vs. inconsistent use of a N95 or surgical mask during direct patient contact in general: OR 0.25 (95% CI 0.004 to 4.76)
- Consistent vs. inconsistent use of a N95 or surgical mask with no patient contact: OR, 0.41 (95% CI 0.06 to 2.44) (Note: comparison was reversed)
- Consistent vs. inconsistent use of N95: 0.48 (95% CI 0.25 to 0.93) (Note: comparison was reversed)
- Consistent vs. inconsistent use of a N95 or surgical mask during direct contact with SARS-1 patient: OR 0.35 (95% CI 0.07 to 1.43) (Note: comparison was reversed)
- Consistent vs. inconsistent use of a N95 or surgical mask during direct patient contact in general: OR 0.78 (95% CI 0.10 to 6.25) (Note: comparison was reversed)
- Consistent vs. inconsistent use of a N95 or surgical mask with no patient contact: OR 0.55 (95% CI 0.21 to 1.39) (Note: comparison was reversed)
- Health care workers in contact with SARS patients (45)
  - Mask use sometimes vs. always: Adjusted RR 0.34 (95% CI 0.09 to 1.37) (Note: comparison was reversed) \*

| <b>Risk of non-coronavirus respiratory infections (influenza-like or other viral respiratory)</b> |              |                                                                                                                                                                                                                                                                                                                                                                                                                                                                                                                                                                                                                                                                                                                                                                                                                                                                                                                                                                                                                                                                                                                                                                                                                                                                                                                                                                                                                                                                                                                |          |
|---------------------------------------------------------------------------------------------------|--------------|----------------------------------------------------------------------------------------------------------------------------------------------------------------------------------------------------------------------------------------------------------------------------------------------------------------------------------------------------------------------------------------------------------------------------------------------------------------------------------------------------------------------------------------------------------------------------------------------------------------------------------------------------------------------------------------------------------------------------------------------------------------------------------------------------------------------------------------------------------------------------------------------------------------------------------------------------------------------------------------------------------------------------------------------------------------------------------------------------------------------------------------------------------------------------------------------------------------------------------------------------------------------------------------------------------------------------------------------------------------------------------------------------------------------------------------------------------------------------------------------------------------|----------|
| <i>N95 respirators vs. surgical masks in higher risk settings</i>                                 | 3 RCT (3532) | Risk of clinical respiratory illness (31-33)                                                                                                                                                                                                                                                                                                                                                                                                                                                                                                                                                                                                                                                                                                                                                                                                                                                                                                                                                                                                                                                                                                                                                                                                                                                                                                                                                                                                                                                                   | Moderate |
|                                                                                                   |              | <ul style="list-style-type: none"> <li>• Health care workers (nurses) with current fit-test certification working full time (&gt;37 hr/wk) in study units during 2008-2009 influenza season wearing protection when providing care or within 1 meter of patient with febrile respiratory illness (31)               <ul style="list-style-type: none"> <li>○ N95 respirator vs. surgical mask: RR 1.01 (95% CI 0.48 to 2.13)</li> </ul> </li> <li>• Full-time health care workers in hospital emergency or respiratory wards wearing masks all work shifts, stored in paper bag for toilet breaks, tea/lunch breaks, and at end of shift (32)               <ul style="list-style-type: none"> <li>○ N95 mask (fit tested) or N95 (non-fit tested) vs. surgical mask: Adjusted OR 0.38 (95% CI 0.17 to 0.86) (Note: Adjusted for hospital, high-risk procedures, flu vaccine in 2008, and handwashing)</li> </ul> </li> <li>• Full-time doctor or nurse working in hospital emergency or respiratory wards (33)               <ul style="list-style-type: none"> <li>○ N95 worn at all times vs. surgical mask worn at all times: Adjusted HR 0.39 (95% CI 0.21 to 0.71) (Note: Adjusted for age, vaccination, handwashing, and being a doctor)</li> <li>○ N95 worn intermittently during high-risk procedures or barrier situations vs. surgical mask worn at all times: Adjusted HR 0.70 (95% CI 0.39 to 1.24) (Note: Adjusted for age, vaccination, handwashing, and being a doctor)</li> </ul> </li> </ul> |          |
|                                                                                                   |              | Risk of influenza-like illness (31-33)                                                                                                                                                                                                                                                                                                                                                                                                                                                                                                                                                                                                                                                                                                                                                                                                                                                                                                                                                                                                                                                                                                                                                                                                                                                                                                                                                                                                                                                                         |          |
|                                                                                                   |              | <ul style="list-style-type: none"> <li>• Health care workers (nurses) with current fit-test certification working full time (&gt;37 hr/wk) in study units during 2008-2009 influenza season wearing protection when providing care or within 1 meter of patient with febrile respiratory illness (31)               <ul style="list-style-type: none"> <li>○ N95 respirator vs. surgical mask: RR 0.58 (95% CI 0.05 to 1.03) (31)</li> </ul> </li> <li>• Full-time health care workers in hospital emergency or respiratory wards wearing masks all work shifts, stored in paper bag for toilet breaks, tea/lunch breaks, and at end of shift (32)               <ul style="list-style-type: none"> <li>○ N95 mask (fit tested) or N95 (non-fit tested) vs. surgical mask: Adjusted OR 0.58 (95% CI 0.10 to 3.47) (Note: Adjusted for hospital, high-risk procedures, flu vaccine in 2008, and handwashing)</li> </ul> </li> <li>• Full-time doctor or nurse working in hospital emergency or respiratory wards (33)               <ul style="list-style-type: none"> <li>○ N95 worn at all times 1.0% vs. surgical mask worn at all times 0.7%, <math>P = 0.54</math></li> <li>○ N95 worn intermittently during high-risk procedures or barrier situations 0.4% vs. surgical mask worn at all times 0.7%, <math>P = 0.49</math></li> </ul> </li> </ul>                                                                                                                                                        |          |
|                                                                                                   |              | Risk of laboratory-confirmed viral respiratory illness (31-33)                                                                                                                                                                                                                                                                                                                                                                                                                                                                                                                                                                                                                                                                                                                                                                                                                                                                                                                                                                                                                                                                                                                                                                                                                                                                                                                                                                                                                                                 |          |
|                                                                                                   |              | <ul style="list-style-type: none"> <li>• Health care workers (nurses) with current fit-test certification working full time (&gt;37 hr/wk) in study units during 2008-2009 influenza season wearing protection when providing care or within 1 meter of patient with febrile respiratory illness (31)               <ul style="list-style-type: none"> <li>○ N95 respirator vs. surgical mask: RR 1.01 (95% CI 0.77, 1.32)</li> </ul> </li> </ul>                                                                                                                                                                                                                                                                                                                                                                                                                                                                                                                                                                                                                                                                                                                                                                                                                                                                                                                                                                                                                                                              |          |



- Full-time health care workers in hospital emergency or respiratory wards wearing masks all work shifts, stored in paper bag for toilet breaks, tea/lunch breaks, and at end of shift (32)
  - N95 mask (fit tested) or N95 (non-fit tested) vs. surgical mask: OR 0.19 (95% CI 0.05 to 0.67) (Note: Adjusted for hospital, high-risk procedures, flu vaccine in 2008, and handwashing)
- Full-time doctor or nurse working in hospital emergency or respiratory wards (33)
  - N95 worn at all times 2.2% vs. surgical mask worn at all times 3.3%,  $P=0.44$
  - N95 worn intermittently during high-risk procedures or barrier situations 3.3% vs. surgical mask worn at all times 3.3%,  $P = 0.99$

Risk of laboratory-confirmed influenza (31-33)

- Health care workers (nurses) with current fit-test certification working full time (>37 hr/wk) in study units during 2008-2009 influenza season wearing protection when providing care or within 1 meter of patient with febrile respiratory illness (31)
  - N95 respirator vs. surgical mask: RR 0.97 (95% CI 0.68 to 1.37)
- Full-time health care workers in hospital emergency or respiratory wards wearing masks all work shifts, stored in paper bag for toilet breaks, tea/lunch breaks, and at end of shift (32)
  - N95 mask (fit tested) or N95 (non-fit tested) vs. surgical mask: OR 0.27 (95% CI 0.06 to 1.17) (Note: Adjusted for hospital, high-risk procedures, flu vaccine in 2008, and handwashing)
- Full-time doctor or nurse working in hospital emergency or respiratory wards (33)
  - N95 worn at all times 0.5% vs. surgical mask worn at all times 0.2%,  $P = 0.35$
  - N95 worn intermittently during high-risk procedures or barrier situations 0.4% vs. surgical mask worn at all times 0.2%,  $P = 0.52$

|                                                                  |              |                                                                                                                                                                                                                                                                                                                                                                                                                                                                                                                                                                                                                                                                                                                                                                                                                                                                                                                                                                                                                                                                                                                                                                                                                                                                                                                                                                                                                                                                                                                                                                                                                                                                                                                                                                                                                                                                                                                                                                                                                                                                                                                                                                                                                                                                                                                                                                                                                                                                                                                                                                                                                                                       |          |
|------------------------------------------------------------------|--------------|-------------------------------------------------------------------------------------------------------------------------------------------------------------------------------------------------------------------------------------------------------------------------------------------------------------------------------------------------------------------------------------------------------------------------------------------------------------------------------------------------------------------------------------------------------------------------------------------------------------------------------------------------------------------------------------------------------------------------------------------------------------------------------------------------------------------------------------------------------------------------------------------------------------------------------------------------------------------------------------------------------------------------------------------------------------------------------------------------------------------------------------------------------------------------------------------------------------------------------------------------------------------------------------------------------------------------------------------------------------------------------------------------------------------------------------------------------------------------------------------------------------------------------------------------------------------------------------------------------------------------------------------------------------------------------------------------------------------------------------------------------------------------------------------------------------------------------------------------------------------------------------------------------------------------------------------------------------------------------------------------------------------------------------------------------------------------------------------------------------------------------------------------------------------------------------------------------------------------------------------------------------------------------------------------------------------------------------------------------------------------------------------------------------------------------------------------------------------------------------------------------------------------------------------------------------------------------------------------------------------------------------------------------|----------|
| <i>N95 respirators vs. surgical masks in lower risk settings</i> | 1 RCT (2862) | <p>Risk of clinical respiratory illness (34)</p> <ul style="list-style-type: none"> <li>• Health care workers in outpatient settings with routine patient contact within 6 feet of patient with suspected or confirmed respiratory illness, during 12 weeks predicted for highest incidence of viral respiratory illness and infections (34)               <ul style="list-style-type: none"> <li>○ N95 vs. surgical mask: Adjusted IRR 0.99 (95% CI 0.92 to 1.06), per protocol analysis IRR 1.00 (95% CI 0.93 to 1.08)</li> </ul> </li> </ul> <p>Risk of influenza-like illness: (34)</p> <ul style="list-style-type: none"> <li>• Health care workers in outpatient settings with routine patient contact within 6 feet of patient with suspected or confirmed respiratory illness, during 12 weeks predicted for highest incidence of viral respiratory illness and infections (34)               <ul style="list-style-type: none"> <li>○ N95 vs. surgical mask: Adjusted IRR 0.86 (95% CI 0.68 to 1.10), per-protocol analysis: IRR 0.83 (95% CI 0.64 to 1.06)</li> </ul> </li> </ul> <p>Risk of laboratory-confirmed respiratory infection (34)</p> <ul style="list-style-type: none"> <li>• Health care workers in outpatient settings with routine patient contact within 6 feet of patient with suspected or confirmed respiratory illness, during 12 weeks predicted for highest incidence of viral respiratory illness and infections (34)               <ul style="list-style-type: none"> <li>○ N95 vs. surgical mask: Adjusted IRR 0.99 (95% CI 0.89 to 1.09)</li> </ul> </li> </ul> <p>Risk of respiratory illness (34)</p> <ul style="list-style-type: none"> <li>• Health care workers in outpatient settings with routine patient contact within 6 feet of patient with suspected or confirmed respiratory illness, during 12 weeks predicted for highest incidence of viral respiratory illness and infections (34)               <ul style="list-style-type: none"> <li>○ N95 vs. surgical mask: Adjusted IRR 0.96 (95% CI 0.83 to 1.11)</li> </ul> </li> </ul> <p>Risk of laboratory-confirmed influenza (34)</p> <ul style="list-style-type: none"> <li>• Health care workers in outpatient settings with routine patient contact within 6 feet of patient with suspected or confirmed respiratory illness, during 12 weeks predicted for highest incidence of viral respiratory illness and infections (34)               <ul style="list-style-type: none"> <li>○ N95 vs. surgical mask: Adjusted IRR 1.18 (95% CI 0.95 to 1.45), Adjusted IRR, per protocol analysis 1.20 (95% CI 0.97 to 1.48) (34)</li> </ul> </li> </ul> | Moderate |
| <i>Surgical masks vs. cloth masks in higher risk settings</i>    | 1 RCT (1868) | <p>Risk of clinical respiratory illness (30)</p> <ul style="list-style-type: none"> <li>• Health care workers on hospital wards (emergency, infection/respiratory disease, intensive care, and pediatrics) wearing masks at all times on work shift (30)</li> </ul>                                                                                                                                                                                                                                                                                                                                                                                                                                                                                                                                                                                                                                                                                                                                                                                                                                                                                                                                                                                                                                                                                                                                                                                                                                                                                                                                                                                                                                                                                                                                                                                                                                                                                                                                                                                                                                                                                                                                                                                                                                                                                                                                                                                                                                                                                                                                                                                   | Low      |

- Cloth mask vs. surgical mask: Adjusted RR 1.56 (95% CI 0.97 to 2.48) (Note: Adjusted for sex, vaccination, handwashing, and compliance)
- Post-hoc analysis of HCWs who exclusively used a cloth or surgical mask irrespective of randomization group, cloth mask vs. surgical mask: RR 1.51 (95% CI 0.97 to 2.32) (Note: Adjusted for sex, vaccination, handwashing, and compliance)

Risk of influenza-like illness (30)

- Health care workers on hospital wards (emergency, infection/respiratory disease, intensive care, and pediatrics) wearing masks at all times on work shift (30)
  - Cloth mask vs. surgical mask: Adjusted RR 13.00 (95% CI 1.69 to 100.07) (Note: Adjusted for sex, vaccination, handwashing, and compliance)
  - Post-hoc analysis of HCWs who exclusively used a cloth or surgical mask irrespective of randomization group, cloth mask vs. surgical mask: RR 6.64 (1.45 to 28.65) (Note: Adjusted for sex, vaccination, handwashing, and compliance)

Risk of laboratory-confirmed viral respiratory illness (30)

- Health care workers on hospital wards (emergency, infection/respiratory disease, intensive care, and pediatrics) wearing masks at all times on work shift (30)
  - Cloth mask vs. surgical mask: Adjusted RR 1.54 (95% CI 0.88 to 2.70) (Note: Adjusted for sex, vaccination, handwashing, and compliance)
  - Post-hoc analysis of HCWs who exclusively used a cloth or surgical mask irrespective of randomization group, cloth mask vs. surgical mask: RR 1.51 (95% CI 0.97 to 2.32) (Note: Adjusted for sex, vaccination, handwashing, and compliance)

|                                                              |               |  Evidence for Potential Harms <sup>¶</sup>                                                                                                                                                                                                                                                                                                                                                                                                                                                                                                                                                                                                                                                                                                                                                                                                                                                                                                                                                                                                                                                                                                                                                                                                                                                                                                                                                                                                                                                                                                                                                                                                                                                                                                                                                                                                                                                                                                                                                                                                                       |          |
|--------------------------------------------------------------|---------------|---------------------------------------------------------------------------------------------------------------------------------------------------------------------------------------------------------------------------------------------------------------------------------------------------------------------------------------------------------------------------------------------------------------------------------------------------------------------------------------------------------------------------------------------------------------------------------------------------------------------------------------------------------------------------------------------------------------------------------------------------------------------------------------------------------------------------------------------------------------------------------------------------------------------------------------------------------------------------------------------------------------------------------------------------------------------------------------------------------------------------------------------------------------------------------------------------------------------------------------------------------------------------------------------------------------------------------------------------------------------------------------------------------------------------------------------------------------------------------------------------------------------------------------------------------------------------------------------------------------------------------------------------------------------------------------------------------------------------------------------------------------------------------------------------------------------------------------------------------------------------------------------------------------------------------------------------------------------------------------------------------------------------------------------------------------------------------------------------------------------------------------------------|----------|
| <i>N95 respirators or equivalent mask vs. surgical masks</i> | 4 RCT (6394)  | <p>Discomfort</p> <ul style="list-style-type: none"> <li>● Full-time doctor or nurse working in hospital emergency or respiratory wards (33)               <ul style="list-style-type: none"> <li>○ N95 worn at all times 62% (357/574) vs. N95 worn intermittently 38% (195/512) vs. surgical mask work at all times 48% (274/571); <math>P &lt; 0.001</math></li> </ul> </li> </ul> <p>Breathing difficulty</p> <ul style="list-style-type: none"> <li>● Full-time health care workers in hospital emergency or respiratory wards wearing masks all work shifts, stored in paper bag for toilet breaks, tea/lunch breaks, and at end of shift (32)               <ul style="list-style-type: none"> <li>○ N95 fit test or not fit tested [19.4% (136/701)] vs. surgical mask [12.5% (35/281)]; <math>P = 0.010</math></li> </ul> </li> </ul> <p>Headache</p> <ul style="list-style-type: none"> <li>● Full-time health care workers in hospital emergency or respiratory wards wearing masks all work shifts, stored in paper bag for toilet breaks, tea/lunch breaks, and at end of shift (32)               <ul style="list-style-type: none"> <li>○ N95 fit test or not fit tested [13.4% (94/701)] vs. surgical mask [3.9% (11/281)]; <math>P &lt; 0.001</math> (32)</li> </ul> </li> </ul> <p>Adverse events</p> <ul style="list-style-type: none"> <li>● Health care workers (nurses) with current fit-test certification working full time (&gt;37 hr/wk) in study units during 2008-2009 influenza season wearing N95 or surgical mask when providing care or within 1 meter of patient with febrile respiratory illness (31)               <ul style="list-style-type: none"> <li>○ No adverse events reported</li> </ul> </li> <li>● Health care workers in outpatient settings with routine patient contact within 6 feet of patient with suspected or confirmed respiratory illness, during 12 weeks predicted for highest incidence of viral respiratory illness and infections wearing N95 or surgical mask (34)               <ul style="list-style-type: none"> <li>○ No serious adverse events reported</li> </ul> </li> </ul> | Low      |
| <i>Surgical masks vs. cloth masks</i>                        | 1 RCTs (1868) | <p>Any adverse event</p> <ul style="list-style-type: none"> <li>● Health care workers on hospital wards (emergency, infection/respiratory disease, intensive care, and pediatrics) wearing masks at all times on work shift (30)               <ul style="list-style-type: none"> <li>○ Surgical or cloth mask [40.4% (227/562)] vs. no mask 42.6% [(242/568)]</li> </ul> </li> </ul> <p>Discomfort</p> <ul style="list-style-type: none"> <li>● Health care workers on hospital wards (emergency, infection/respiratory disease, intensive care, and pediatrics) wearing masks at all times on work shift (30)               <ul style="list-style-type: none"> <li>○ Surgical or cloth mask 35% overall</li> </ul> </li> </ul> <p>Breathing problems:</p> <ul style="list-style-type: none"> <li>● Health care workers on hospital wards (emergency, infection/respiratory disease, intensive care, and pediatrics) wearing masks at all times on work shift (30)               <ul style="list-style-type: none"> <li>○ Surgical or cloth mask 18% overall</li> </ul> </li> </ul>                                                                                                                                                                                                                                                                                                                                                                                                                                                                                                                                                                                                                                                                                                                                                                                                                                                                                                                                                                                                                                                              | Moderate |
